# Supplementary material for: An ultrahigh discharged energy density achieved in an inhomogeneous PVDF dielectric composite filled with 2D MXene nanosheets via interface engineering
Source: Royal Society of Chemistry journal article supplement (doi:10.1039/c8tc05180a), 2018-01-01
Supplement: c8tc05180a1.pdf [file c8tc05180a1.pdf]

## Supporting Information for Publication

### Ultrahigh discharged energy density achieved in inhomogeneous PVDF dielectric composite filled with 2D MXene nanosheets via interface engineering

Yefeng Feng, Qihuang Deng\*, Cheng Peng\*, Jianbing Hu, Yandong Li\*, Qin Wu, Zhichao Xu

The composition of PVDF was characterized through  $^1\text{H}$  NMR and GPC results as exhibited in Fig. S1. In Fig. S2, the surface morphology of MXene-2 was achieved through SEM measurements. The breakdown strength results of gradient two-layer composites (including 2-1 and 2-0.1) and sandwich PVDF/MXene-2/PVDF composite (namely 0-2-0) were shown in Fig. S3. The results further confirmed the superiority of 2-1-0.1 sample at high breakdown property. The effect of various MXene contents on dielectric constant (@100Hz) of gradient sandwich nanocomposites (including 3-1-0.1, 2-1.5-0.1 and 2-1-0.5 samples) was displayed in Fig. S4.

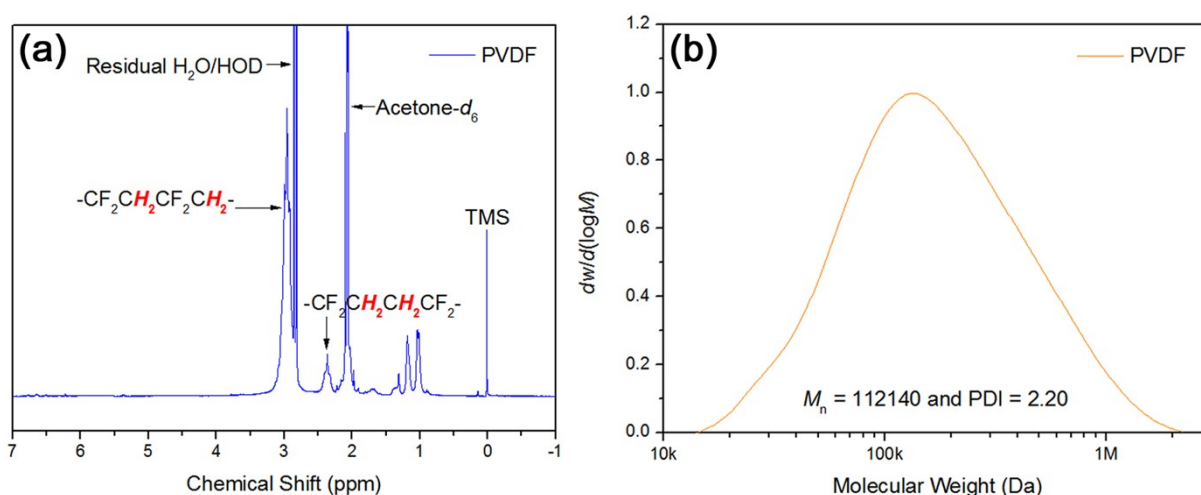

Figure S1. (a)  $^1\text{H}$  NMR and (b) GPC of PVDF, respectively.

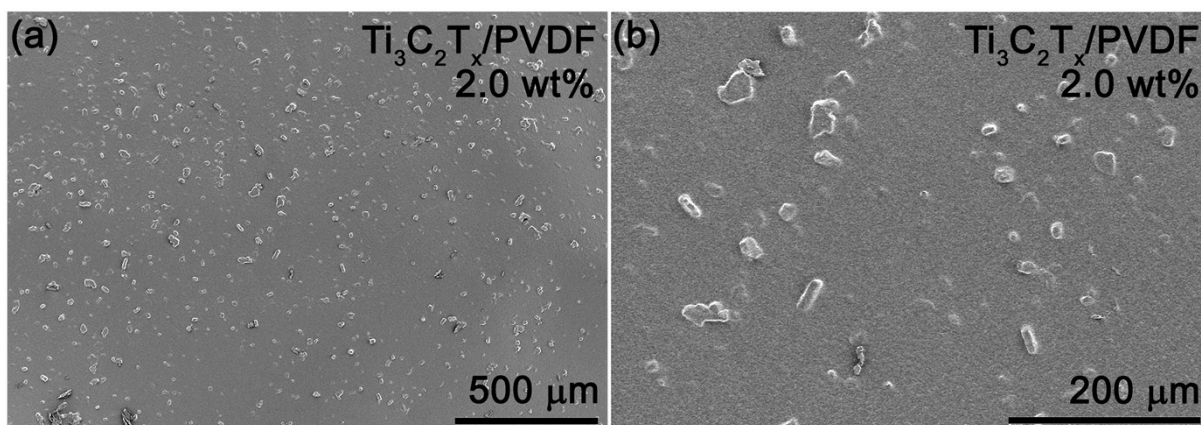

Figure S2. Surface SEM of MXene-2 film with (a) low and (b) high magnification.

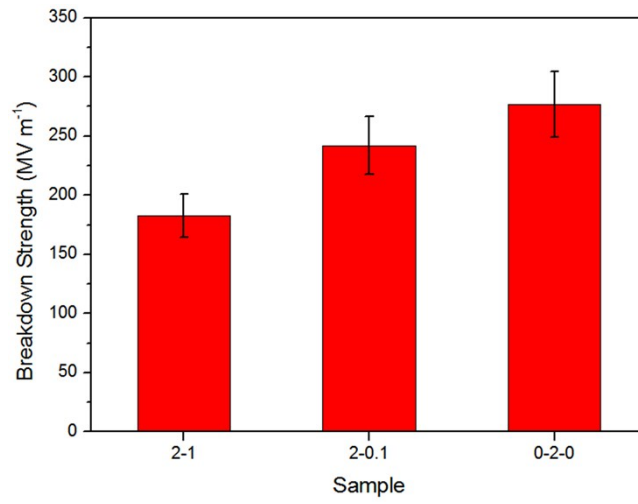

**Figure S3.** Breakdown strength results of 2-1, 2-0.1 and 0-2-0 samples.

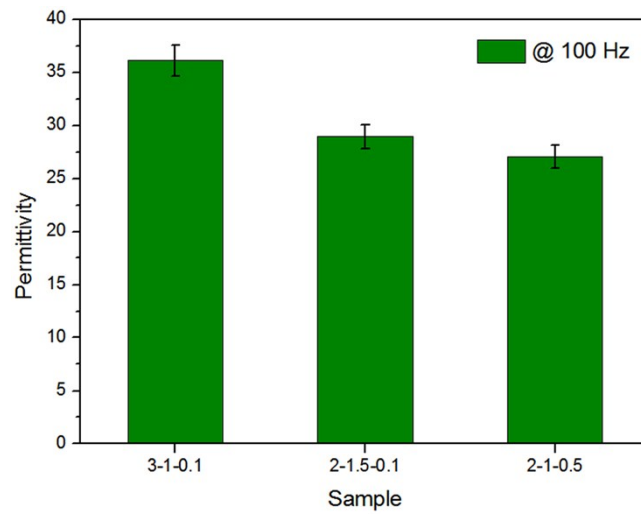

**Figure S4.** Dielectric constant of 3-1-0.1, 2-1.5-0.1 and 2-1-0.5 samples at 100 Hz.
